# Supplementary material for: Root Electrical Capacitance Can Be a Promising Plant Phenotyping Parameter in Wheat
Source: MDPI journal article supplement (doi:10.3390/plants11212975), 2022-11-04
Supplement: s1 [file s1]

**Table S1:** The coefficient of determination ( $R^2$ ) values and statistical significances (based on the F test) for the linear regressions between the measured individual plant parameters for wheat cultivar Káplár in two years. The regressions were established for individual plants ( $n = 60$ ).  $C_R^*$ : saturation root electrical capacitance; PH: plant height; CSA: stem cross-sectional area; SL: spike length; FLL: flag leaf length; FLW: flag leaf width; FLA: flag leaf area; SPAD: chlorophyll content in flag leaf; TAB: total aboveground biomass; GM: grain mass; GN: grain number.  $*p < 0.05$ ,  $**p < 0.01$ ,  $***p < 0.001$ , NS not significant.

| Year | Parameter | $C_R^*$  | PH       | CSA      | PH×CSA   | SL       | FLL      | FLW      | FLA      | SPAD     | FLA×SPAD | TAB      | GM       |
|------|-----------|----------|----------|----------|----------|----------|----------|----------|----------|----------|----------|----------|----------|
| 2021 | PH        | 0.281*** |          |          |          |          |          |          |          |          |          |          |          |
|      | CSA       | 0.497*** | 0.424*** |          |          |          |          |          |          |          |          |          |          |
|      | PH×CSA    | 0.501*** | 0.681*** | 0.926*** |          |          |          |          |          |          |          |          |          |
|      | SL        | 0.564*** | 0.487*** | 0.571*** | 0.630*** |          |          |          |          |          |          |          |          |
|      | FLL       | 0.594*** | 0.170**  | 0.317*** | 0.315*** | 0.427*** |          |          |          |          |          |          |          |
|      | FLW       | 0.621*** | 0.390*** | 0.741*** | 0.730*** | 0.607*** | 0.559*** |          |          |          |          |          |          |
|      | FLA       | 0.693*** | 0.293*** | 0.551*** | 0.549*** | 0.563*** | 0.886*** | 0.851*** |          |          |          |          |          |
|      | SPAD      | 0.502*** | 0.465*** | 0.565*** | 0.630*** | 0.432*** | 0.375*** | 0.553*** | 0.499*** |          |          |          |          |
|      | FLA×SPAD  | 0.723*** | 0.390*** | 0.626*** | 0.655*** | 0.586*** | 0.804*** | 0.862*** | 0.955*** | 0.690*** |          |          |          |
|      | TAB       | 0.524*** | 0.474*** | 0.481*** | 0.567*** | 0.512*** | 0.512*** | 0.591*** | 0.635*** | 0.443*** | 0.664*** |          |          |
|      | GM        | 0.560*** | 0.431*** | 0.436*** | 0.511*** | 0.510*** | 0.545*** | 0.558*** | 0.636*** | 0.427*** | 0.651*** | 0.945*** |          |
|      | GN        | 0.489*** | 0.421*** | 0.400*** | 0.476*** | 0.495*** | 0.515*** | 0.527*** | 0.600*** | 0.399*** | 0.610*** | 0.922*** | 0.968*** |
| 2022 | PH        | 0.249*** |          |          |          |          |          |          |          |          |          |          |          |
|      | CSA       | 0.464*** | 0.354*** |          |          |          |          |          |          |          |          |          |          |
|      | PH×CSA    | 0.474*** | 0.564*** | 0.950*** |          |          |          |          |          |          |          |          |          |
|      | SL        | 0.458*** | 0.482*** | 0.518*** | 0.571*** |          |          |          |          |          |          |          |          |
|      | FLL       | 0.474*** | 0.196*** | 0.395*** | 0.385*** | 0.485*** |          |          |          |          |          |          |          |
|      | FLW       | 0.552*** | 0.318*** | 0.572*** | 0.574*** | 0.501*** | 0.612*** |          |          |          |          |          |          |
|      | FLA       | 0.564*** | 0.247*** | 0.509*** | 0.499*** | 0.518*** | 0.922*** | 0.841*** |          |          |          |          |          |
|      | SPAD      | 0.628*** | 0.388*** | 0.571*** | 0.597*** | 0.538*** | 0.420*** | 0.620*** | 0.531*** |          |          |          |          |
|      | FLA×SPAD  | 0.665*** | 0.307*** | 0.598*** | 0.599*** | 0.559*** | 0.829*** | 0.852*** | 0.944*** | 0.732*** |          |          |          |
|      | TAB       | 0.522*** | 0.210*** | 0.373*** | 0.375*** | 0.609*** | 0.499*** | 0.506*** | 0.563*** | 0.464*** | 0.603*** |          |          |
|      | GM        | 0.612*** | 0.268*** | 0.418*** | 0.436*** | 0.632*** | 0.520*** | 0.535*** | 0.591*** | 0.500*** | 0.641*** | 0.914*** |          |
|      | GN        | 0.552*** | 0.302*** | 0.364*** | 0.399*** | 0.649*** | 0.521*** | 0.511*** | 0.568*** | 0.527*** | 0.620*** | 0.909*** | 0.906*** |

**Table S2:** The coefficient of determination ( $R^2$ ) values and statistical significances (based on the F test) for the linear regressions between the measured individual plant parameters for wheat cultivar Kolo in two years. The regressions were established for individual plants ( $n = 60$ ). For the abbreviations and symbols, see Table S1.

| Year | Parameter | Cr*                 | PH                  | CSA      | PH×CSA   | SL       | FLL      | FLW      | FLA      | SPAD     | FLA×SPAD | TAB      | GM       |
|------|-----------|---------------------|---------------------|----------|----------|----------|----------|----------|----------|----------|----------|----------|----------|
| 2021 | PH        | 0.275***            |                     |          |          |          |          |          |          |          |          |          |          |
|      | CSA       | 0.368***            | 0.051 <sup>NS</sup> |          |          |          |          |          |          |          |          |          |          |
|      | PH×CSA    | 0.511***            | 0.415***            | 0.787*** |          |          |          |          |          |          |          |          |          |
|      | SL        | 0.338***            | 0.299***            | 0.307*** | 0.481*** |          |          |          |          |          |          |          |          |
|      | FLL       | 0.680***            | 0.213***            | 0.382*** | 0.498*** | 0.492*** |          |          |          |          |          |          |          |
|      | FLW       | 0.507***            | 0.056 <sup>NS</sup> | 0.452*** | 0.400*** | 0.161**  | 0.447*** |          |          |          |          |          |          |
|      | FLA       | 0.723***            | 0.163**             | 0.470*** | 0.530*** | 0.395*** | 0.887*** | 0.764*** |          |          |          |          |          |
|      | SPAD      | 0.424***            | 0.278***            | 0.352*** | 0.508*** | 0.515*** | 0.563*** | 0.265*** | 0.508*** |          |          |          |          |
|      | FLA×SPAD  | 0.688***            | 0.229***            | 0.473*** | 0.589*** | 0.491*** | 0.875*** | 0.626*** | 0.925*** | 0.752*** |          |          |          |
|      | TAB       | 0.545***            | 0.239***            | 0.222*** | 0.362*** | 0.274*** | 0.468*** | 0.246*** | 0.455*** | 0.349*** | 0.500*** |          |          |
|      | GM        | 0.552***            | 0.256***            | 0.169**  | 0.320*** | 0.284*** | 0.456*** | 0.245*** | 0.452*** | 0.343*** | 0.498*** | 0.908*** |          |
|      | GN        | 0.508***            | 0.295***            | 0.193*** | 0.368*** | 0.359*** | 0.485*** | 0.219*** | 0.451*** | 0.397*** | 0.521*** | 0.866*** | 0.923*** |
| 2022 | PH        | 0.043 <sup>NS</sup> |                     |          |          |          |          |          |          |          |          |          |          |
|      | CSA       | 0.216***            | 0.351***            |          |          |          |          |          |          |          |          |          |          |
|      | PH×CSA    | 0.173***            | 0.632***            | 0.915*** |          |          |          |          |          |          |          |          |          |
|      | SL        | 0.262***            | 0.482***            | 0.618*** | 0.686*** |          |          |          |          |          |          |          |          |
|      | FLL       | 0.602***            | 0.083*              | 0.144**  | 0.305*** | 0.244*** |          |          |          |          |          |          |          |
|      | FLW       | 0.581***            | 0.143**             | 0.371*** | 0.338*** | 0.407*** | 0.619*** |          |          |          |          |          |          |
|      | FLA       | 0.681***            | 0.200***            | 0.241*** | 0.183*** | 0.330*** | 0.940*** | 0.823*** |          |          |          |          |          |
|      | SPAD      | 0.328***            | 0.289***            | 0.409*** | 0.438*** | 0.465*** | 0.418*** | 0.579*** | 0.501*** |          |          |          |          |
|      | FLA×SPAD  | 0.662***            | 0.313***            | 0.333*** | 0.285*** | 0.422*** | 0.868*** | 0.834*** | 0.952*** | 0.699*** |          |          |          |
|      | TAB       | 0.583***            | 0.257***            | 0.524*** | 0.510*** | 0.685*** | 0.380*** | 0.526*** | 0.489*** | 0.453*** | 0.559*** |          |          |
|      | GM        | 0.702***            | 0.179***            | 0.420*** | 0.396*** | 0.527*** | 0.399*** | 0.519*** | 0.504*** | 0.406*** | 0.558*** | 0.907*** |          |
|      | GN        | 0.696***            | 0.186***            | 0.412*** | 0.395*** | 0.520*** | 0.403*** | 0.538*** | 0.513*** | 0.422*** | 0.570*** | 0.874*** | 0.956*** |

**Table S3:** The coefficient of determination ( $R^2$ ) values and statistical significances (based on the F test) for the linear regressions between the measured individual plant parameters for wheat cultivar Lucilla in two years. The regressions were established for individual plants (n = 60). For the abbreviations and symbols, see Table S1.

| Year | Parameter | Cr*      | PH       | CSA      | PH×CSA   | SL       | FLL      | FLW      | FLA      | SPAD     | FLA×SPAD | TAB      | GM       |
|------|-----------|----------|----------|----------|----------|----------|----------|----------|----------|----------|----------|----------|----------|
| 2021 | PH        | 0.412*** |          |          |          |          |          |          |          |          |          |          |          |
|      | CSA       | 0.405*** | 0.499*** |          |          |          |          |          |          |          |          |          |          |
|      | PH×CSA    | 0.475*** | 0.704*** | 0.945*** |          |          |          |          |          |          |          |          |          |
|      | SL        | 0.451*** | 0.613*** | 0.758*** | 0.811*** |          |          |          |          |          |          |          |          |
|      | FLL       | 0.522*** | 0.342*** | 0.483*** | 0.492*** | 0.465*** |          |          |          |          |          |          |          |
|      | FLW       | 0.650*** | 0.572*** | 0.576*** | 0.645*** | 0.667*** | 0.609*** |          |          |          |          |          |          |
|      | FLA       | 0.680*** | 0.482*** | 0.569*** | 0.617*** | 0.616*** | 0.862*** | 0.896*** |          |          |          |          |          |
|      | SPAD      | 0.565*** | 0.537*** | 0.585*** | 0.637*** | 0.641*** | 0.611*** | 0.788*** | 0.757*** |          |          |          |          |
|      | FLA×SPAD  | 0.697*** | 0.493*** | 0.568*** | 0.627*** | 0.629*** | 0.794*** | 0.895*** | 0.973*** | 0.838*** |          |          |          |
|      | TAB       | 0.645*** | 0.658*** | 0.665*** | 0.775*** | 0.790*** | 0.598*** | 0.665*** | 0.711*** | 0.605*** | 0.707*** |          |          |
|      | GM        | 0.701*** | 0.584*** | 0.611*** | 0.708*** | 0.788*** | 0.596*** | 0.673*** | 0.732*** | 0.585*** | 0.738*** | 0.906*** |          |
|      | GN        | 0.662*** | 0.574*** | 0.620*** | 0.713*** | 0.799*** | 0.602*** | 0.664*** | 0.723*** | 0.586*** | 0.725*** | 0.912*** | 0.974*** |
| 2022 | PH        | 0.149**  |          |          |          |          |          |          |          |          |          |          |          |
|      | CSA       | 0.193*** | 0.072*   |          |          |          |          |          |          |          |          |          |          |
|      | PH×CSA    | 0.255*** | 0.308*** | 0.898*** |          |          |          |          |          |          |          |          |          |
|      | SL        | 0.588*** | 0.471*** | 0.291*** | 0.481*** |          |          |          |          |          |          |          |          |
|      | FLL       | 0.611*** | 0.167**  | 0.229*** | 0.219*** | 0.443*** |          |          |          |          |          |          |          |
|      | FLW       | 0.558*** | 0.174*** | 0.288*** | 0.365*** | 0.643*** | 0.595*** |          |          |          |          |          |          |
|      | FLA       | 0.660*** | 0.277*** | 0.271*** | 0.294*** | 0.579*** | 0.923*** | 0.831*** |          |          |          |          |          |
|      | SPAD      | 0.605*** | 0.384*** | 0.320*** | 0.474*** | 0.727*** | 0.468*** | 0.615*** | 0.573*** |          |          |          |          |
|      | FLA×SPAD  | 0.711*** | 0.155**  | 0.304*** | 0.369*** | 0.682*** | 0.849*** | 0.839*** | 0.956*** | 0.750*** |          |          |          |
|      | TAB       | 0.565*** | 0.203*** | 0.131**  | 0.215*** | 0.748*** | 0.473*** | 0.484*** | 0.535*** | 0.486*** | 0.575*** |          |          |
|      | GM        | 0.608*** | 0.194*** | 0.212*** | 0.300*** | 0.776*** | 0.542*** | 0.580*** | 0.624*** | 0.548*** | 0.664*** | 0.896*** |          |
|      | GN        | 0.576*** | 0.242*** | 0.139**  | 0.235*** | 0.766*** | 0.490*** | 0.523*** | 0.569*** | 0.538*** | 0.624*** | 0.911*** | 0.920*** |

**Table S4:** The coefficient of determination ( $R^2$ ) values and statistical significances (based on the F test) for the linear regressions between the measured individual plant parameters for wheat cultivar Ménrôt in two years. The regressions were established for individual plants (n = 60). For the abbreviations and symbols, see Table S1.

| Year | Parameter | Cr*      | PH                  | CSA      | PH×CSA   | SL       | FLL      | FLW      | FLA      | SPAD     | FLA×SPAD | TAB      | GM       |
|------|-----------|----------|---------------------|----------|----------|----------|----------|----------|----------|----------|----------|----------|----------|
| 2021 | PH        | 0.165**  |                     |          |          |          |          |          |          |          |          |          |          |
|      | CSA       | 0.355*** | 0.357***            |          |          |          |          |          |          |          |          |          |          |
|      | PH×CSA    | 0.354*** | 0.597***            | 0.939*** |          |          |          |          |          |          |          |          |          |
|      | SL        | 0.385*** | 0.387***            | 0.524*** | 0.579*** |          |          |          |          |          |          |          |          |
|      | FLL       | 0.533*** | 0.081*              | 0.354*** | 0.313*** | 0.563*** |          |          |          |          |          |          |          |
|      | FLW       | 0.595*** | 0.267***            | 0.650*** | 0.629*** | 0.598*** | 0.650*** |          |          |          |          |          |          |
|      | FLA       | 0.604*** | 0.152**             | 0.500*** | 0.462*** | 0.623*** | 0.947*** | 0.840*** |          |          |          |          |          |
|      | SPAD      | 0.533*** | 0.343***            | 0.474*** | 0.518*** | 0.539*** | 0.398*** | 0.563*** | 0.500*** |          |          |          |          |
|      | FLA×SPAD  | 0.654*** | 0.221***            | 0.551*** | 0.537*** | 0.669*** | 0.868*** | 0.842*** | 0.952*** | 0.702*** |          |          |          |
|      | TAB       | 0.633*** | 0.206***            | 0.447*** | 0.450*** | 0.474*** | 0.456*** | 0.524*** | 0.524*** | 0.512*** | 0.581*** |          |          |
|      | GM        | 0.696*** | 0.196***            | 0.437*** | 0.435*** | 0.437*** | 0.420*** | 0.558*** | 0.510*** | 0.518*** | 0.571*** | 0.887*** |          |
|      | GN        | 0.628*** | 0.219***            | 0.390*** | 0.409*** | 0.437*** | 0.389*** | 0.508*** | 0.470*** | 0.446*** | 0.516*** | 0.886*** | 0.960*** |
| 2022 | PH        | 0.155**  |                     |          |          |          |          |          |          |          |          |          |          |
|      | CSA       | 0.291*** | 0.005 <sup>NS</sup> |          |          |          |          |          |          |          |          |          |          |
|      | PH×CSA    | 0.402*** | 0.154**             | 0.889*** |          |          |          |          |          |          |          |          |          |
|      | SL        | 0.415*** | 0.149**             | 0.326*** | 0.185*** |          |          |          |          |          |          |          |          |
|      | FLL       | 0.621*** | 0.214***            | 0.177*** | 0.205*** | 0.200*** |          |          |          |          |          |          |          |
|      | FLW       | 0.507*** | 0.195***            | 0.122**  | 0.145**  | 0.194*** | 0.684*** |          |          |          |          |          |          |
|      | FLA       | 0.625*** | 0.210***            | 0.166**  | 0.194*** | 0.225*** | 0.954*** | 0.852*** |          |          |          |          |          |
|      | SPAD      | 0.599*** | 0.209***            | 0.145**  | 0.256*** | 0.271*** | 0.438*** | 0.353*** | 0.441*** |          |          |          |          |
|      | FLA×SPAD  | 0.719*** | 0.303***            | 0.183*** | 0.243*** | 0.283*** | 0.907*** | 0.772*** | 0.940*** | 0.668*** |          |          |          |
|      | TAB       | 0.620*** | 0.176***            | 0.219*** | 0.286*** | 0.281*** | 0.340*** | 0.292*** | 0.347*** | 0.295*** | 0.390*** |          |          |
|      | GM        | 0.697*** | 0.115**             | 0.225*** | 0.312*** | 0.329*** | 0.398*** | 0.338*** | 0.407*** | 0.351*** | 0.458*** | 0.905*** |          |
|      | GN        | 0.696*** | 0.131**             | 0.246*** | 0.345*** | 0.346*** | 0.397*** | 0.331*** | 0.401*** | 0.355*** | 0.453*** | 0.889*** | 0.941*** |

**Table S5:** The coefficient of determination ( $R^2$ ) values and statistical significances (based on the F test) for the linear regressions between the measured individual plant parameters for wheat cultivar Pántlika in two years. The regressions were established for individual plants (n = 60). For the abbreviations and symbols, see Table S1.

| Year | Parameter | Cr*      | PH       | CSA      | PH×CSA   | SL       | FLL      | FLW      | FLA      | SPAD     | FLA×SPAD | TAB      | GM       |
|------|-----------|----------|----------|----------|----------|----------|----------|----------|----------|----------|----------|----------|----------|
| 2021 | PH        | 0.361*** |          |          |          |          |          |          |          |          |          |          |          |
|      | CSA       | 0.533*** | 0.580*** |          |          |          |          |          |          |          |          |          |          |
|      | PH×CSA    | 0.533*** | 0.821*** | 0.921*** |          |          |          |          |          |          |          |          |          |
|      | SL        | 0.572*** | 0.620*** | 0.744*** | 0.778*** |          |          |          |          |          |          |          |          |
|      | FLL       | 0.600*** | 0.212*** | 0.546*** | 0.447*** | 0.584*** |          |          |          |          |          |          |          |
|      | FLW       | 0.664*** | 0.466*** | 0.707*** | 0.683*** | 0.733*** | 0.733*** |          |          |          |          |          |          |
|      | FLA       | 0.688*** | 0.347*** | 0.668*** | 0.602*** | 0.700*** | 0.935*** | 0.910*** |          |          |          |          |          |
|      | SPAD      | 0.626*** | 0.655*** | 0.638*** | 0.736*** | 0.729*** | 0.478*** | 0.636*** | 0.592*** |          |          |          |          |
|      | FLA×SPAD  | 0.738*** | 0.535*** | 0.731*** | 0.750*** | 0.788*** | 0.800*** | 0.871*** | 0.913*** | 0.827*** |          |          |          |
|      | TAB       | 0.551*** | 0.612*** | 0.565*** | 0.676*** | 0.739*** | 0.446*** | 0.605*** | 0.572*** | 0.750*** | 0.741*** |          |          |
|      | GM        | 0.560*** | 0.620*** | 0.630*** | 0.726*** | 0.758*** | 0.495*** | 0.658*** | 0.629*** | 0.754*** | 0.794*** | 0.909*** |          |
|      | GN        | 0.548*** | 0.606*** | 0.614*** | 0.710*** | 0.762*** | 0.507*** | 0.629*** | 0.630*** | 0.748*** | 0.793*** | 0.895*** | 0.983*** |
| 2022 | PH        | 0.268*** |          |          |          |          |          |          |          |          |          |          |          |
|      | CSA       | 0.129**  | 0.244*** |          |          |          |          |          |          |          |          |          |          |
|      | PH×CSA    | 0.225*** | 0.538*** | 0.905*** |          |          |          |          |          |          |          |          |          |
|      | SL        | 0.381*** | 0.347*** | 0.257*** | 0.170**  |          |          |          |          |          |          |          |          |
|      | FLL       | 0.484*** | 0.290*** | 0.265*** | 0.161**  | 0.492*** |          |          |          |          |          |          |          |
|      | FLW       | 0.634*** | 0.388*** | 0.290*** | 0.207*** | 0.580*** | 0.674*** |          |          |          |          |          |          |
|      | FLA       | 0.601*** | 0.366*** | 0.302*** | 0.210*** | 0.573*** | 0.930*** | 0.878*** |          |          |          |          |          |
|      | SPAD      | 0.509*** | 0.319*** | 0.370*** | 0.234*** | 0.417*** | 0.389*** | 0.437*** | 0.428*** |          |          |          |          |
|      | FLA×SPAD  | 0.682*** | 0.427*** | 0.377*** | 0.284*** | 0.598*** | 0.848*** | 0.832*** | 0.926*** | 0.676*** |          |          |          |
|      | TAB       | 0.557*** | 0.271*** | 0.274*** | 0.437*** | 0.312*** | 0.430*** | 0.367*** | 0.442*** | 0.460*** | 0.533*** |          |          |
|      | GM        | 0.609*** | 0.327*** | 0.254*** | 0.368*** | 0.340*** | 0.427*** | 0.413*** | 0.468*** | 0.470*** | 0.566*** | 0.918*** |          |
|      | GN        | 0.603*** | 0.192*** | 0.242*** | 0.351*** | 0.368*** | 0.399*** | 0.418*** | 0.450*** | 0.412*** | 0.521*** | 0.872*** | 0.936*** |

**Table S6:** The slope ( $\pm$ SE) and y-intercept ( $\pm$ SE) for the linear regressions between the saturation root electrical capacitance ( $C_{R^*}$ ) and various plant parameters investigated in five wheat cultivars in two years. The regressions were established for individual plants ( $n = 60$ ). For the abbreviations, see Table S1.

| Year | Parameter         | Káplár            |                 | Kolo              |                 | Lucilla           |                   | Ménrót            |                  | Pántlika          |                  |
|------|-------------------|-------------------|-----------------|-------------------|-----------------|-------------------|-------------------|-------------------|------------------|-------------------|------------------|
|      |                   | Slope             | Intercept       | Slope             | Intercept       | Slope             | Intercept         | Slope             | Intercept        | Slope             | Intercept        |
| 2021 | PH                | 0.079 $\pm$ 0.017 | 2.73 $\pm$ 1.04 | 0.097 $\pm$ 0.021 | 1.68 $\pm$ 1.43 | 0.101 $\pm$ 0.016 | 1.34 $\pm$ 1.16   | 0.085 $\pm$ 0.025 | 3.08 $\pm$ 1.70  | 0.104 $\pm$ 0.018 | 1.74 $\pm$ 1.11  |
|      | CSA               | 0.366 $\pm$ 0.048 | 4.44 $\pm$ 0.43 | 0.426 $\pm$ 0.073 | 3.94 $\pm$ 0.77 | 0.322 $\pm$ 0.051 | 5.27 $\pm$ 0.56   | 0.314 $\pm$ 0.055 | 5.55 $\pm$ 0.59  | 0.495 $\pm$ 0.061 | 3.48 $\pm$ 0.58  |
|      | PH $\times$ CSA   | 0.424 $\pm$ 0.055 | 5.33 $\pm$ 0.32 | 0.585 $\pm$ 0.074 | 4.16 $\pm$ 0.55 | 0.353 $\pm$ 0.049 | 5.91 $\pm$ 0.41   | 0.367 $\pm$ 0.065 | 6.21 $\pm$ 0.48  | 0.525 $\pm$ 0.065 | 5.05 $\pm$ 0.39  |
|      | SL                | 0.778 $\pm$ 0.090 | 2.27 $\pm$ 0.63 | 0.969 $\pm$ 0.178 | 1.86 $\pm$ 1.20 | 0.787 $\pm$ 0.114 | 3.38 $\pm$ 0.78   | 0.911 $\pm$ 0.151 | 3.00 $\pm$ 0.97  | 1.043 $\pm$ 0.119 | 1.43 $\pm$ 0.76  |
|      | FLL               | 0.353 $\pm$ 0.038 | 3.34 $\pm$ 0.48 | 0.492 $\pm$ 0.044 | 1.70 $\pm$ 0.61 | 0.567 $\pm$ 0.071 | 1.58 $\pm$ 0.90   | 0.470 $\pm$ 0.058 | 3.31 $\pm$ 0.69  | 0.502 $\pm$ 0.054 | 0.94 $\pm$ 0.77  |
|      | FLW               | 0.528 $\pm$ 0.054 | 2.14 $\pm$ 0.57 | 0.701 $\pm$ 0.061 | 0.28 $\pm$ 1.13 | 0.553 $\pm$ 0.053 | 1.81 $\pm$ 0.67   | 0.797 $\pm$ 0.086 | 0.71 $\pm$ 1.038 | 0.859 $\pm$ 0.080 | 1.35 $\pm$ 0.88  |
|      | FLA               | 0.279 $\pm$ 0.024 | 4.94 $\pm$ 0.25 | 0.362 $\pm$ 0.029 | 3.78 $\pm$ 0.38 | 0.330 $\pm$ 0.030 | 4.76 $\pm$ 0.37   | 0.364 $\pm$ 0.038 | 4.95 $\pm$ 0.42  | 0.380 $\pm$ 0.033 | 3.56 $\pm$ 0.40  |
|      | SPAD              | 0.200 $\pm$ 0.026 | 1.68 $\pm$ 0.78 | 0.223 $\pm$ 0.034 | 1.29 $\pm$ 1.09 | 0.211 $\pm$ 0.024 | 1.52 $\pm$ 0.83   | 0.271 $\pm$ 0.033 | 0.41 $\pm$ 1.14  | 0.246 $\pm$ 0.025 | 0.99 $\pm$ 0.72  |
|      | FLA $\times$ SPAD | .0071 $\pm$ .0005 | 5.54 $\pm$ 0.18 | .0078 $\pm$ .0007 | 5.17 $\pm$ 0.30 | .0064 $\pm$ .0006 | 5.97 $\pm$ 0.26   | .0084 $\pm$ .0008 | 5.71 $\pm$ 0.31  | .0088 $\pm$ .0006 | 4.98 $\pm$ 0.26  |
|      | TAB               | 1.054 $\pm$ 0.131 | 5.82 $\pm$ 0.24 | 2.051 $\pm$ 0.244 | 3.95 $\pm$ 0.53 | 1.987 $\pm$ 0.194 | 4.66 $\pm$ 0.41   | 1.695 $\pm$ 0.170 | 5.17 $\pm$ 0.38  | 1.735 $\pm$ 0.206 | 4.82 $\pm$ 0.40  |
|      | GM                | 2.119 $\pm$ 0.247 | 5.90 $\pm$ 0.22 | 4.855 $\pm$ 0.574 | 4.15 $\pm$ 0.51 | 4.168 $\pm$ 0.357 | 5.20 $\pm$ 0.32   | 3.558 $\pm$ 0.309 | 5.83 $\pm$ 0.27  | 3.646 $\pm$ 0.424 | 5.48 $\pm$ 0.32  |
|      | GN                | 0.084 $\pm$ 0.011 | 5.88 $\pm$ 0.25 | 0.177 $\pm$ 0.023 | 4.63 $\pm$ 0.50 | 0.188 $\pm$ 0.017 | 4.95 $\pm$ 0.37   | 0.152 $\pm$ 0.015 | 5.83 $\pm$ 0.31  | 0.177 $\pm$ 0.021 | 5.33 $\pm$ 0.34  |
| 2022 | PH                | 0.095 $\pm$ 0.022 | 2.03 $\pm$ 1.53 | 0.033 $\pm$ 0.021 | 6.35 $\pm$ 1.56 | 0.088 $\pm$ 0.027 | 3.82 $\pm$ 1.88   | 0.153 $\pm$ 0.047 | 0.64 $\pm$ 3.63  | 0.146 $\pm$ 0.032 | 0.38 $\pm$ 2.16  |
|      | CSA               | 0.305 $\pm$ 0.043 | 5.41 $\pm$ 0.48 | 0.248 $\pm$ 0.073 | 6.30 $\pm$ 0.65 | 0.225 $\pm$ 0.060 | 7.134 $\pm$ 0.73  | 0.388 $\pm$ 0.080 | 5.67 $\pm$ 1.14  | 0.258 $\pm$ 0.088 | 7.34 $\pm$ 0.101 |
|      | PH $\times$ CSA   | 0.352 $\pm$ 0.049 | 5.98 $\pm$ 0.32 | 0.223 $\pm$ 0.064 | 7.11 $\pm$ 0.52 | 0.331 $\pm$ 0.074 | 7.11 $\pm$ 0.62   | 0.547 $\pm$ 0.088 | 5.18 $\pm$ 0.98  | 0.380 $\pm$ 0.093 | 7.32 $\pm$ 0.74  |
|      | SL                | 0.864 $\pm$ 0.123 | 2.56 $\pm$ 0.88 | 0.716 $\pm$ 0.158 | 4.11 $\pm$ 1.05 | 1.049 $\pm$ 0.115 | 2.38 $\pm$ 0.82   | 1.009 $\pm$ 0.157 | 3.60 $\pm$ 1.19  | 1.020 $\pm$ 0.171 | 2.82 $\pm$ 1.26  |
|      | FLL               | 0.404 $\pm$ 0.056 | 3.53 $\pm$ 0.73 | 0.392 $\pm$ 0.042 | 3.57 $\pm$ 0.57 | 0.515 $\pm$ 0.054 | 2.73 $\pm$ 0.75   | 0.489 $\pm$ 0.050 | 3.38 $\pm$ 0.77  | 0.444 $\pm$ 0.060 | 3.00 $\pm$ 0.99  |
|      | FLW               | 0.631 $\pm$ 0.075 | 0.91 $\pm$ 0.93 | 0.685 $\pm$ 0.076 | 0.25 $\pm$ 0.96 | 0.717 $\pm$ 0.084 | 0.053 $\pm$ 1.16  | 0.777 $\pm$ 0.098 | 0.680 $\pm$ 1.37 | 0.930 $\pm$ 0.093 | 1.36 $\pm$ 1.16  |
|      | FLA               | 0.291 $\pm$ 0.033 | 5.20 $\pm$ 0.42 | 0.285 $\pm$ 0.026 | 5.18 $\pm$ 0.34 | 0.322 $\pm$ 0.030 | 5.20 $\pm$ 0.45   | 0.303 $\pm$ 0.031 | 6.33 $\pm$ 0.52  | 0.319 $\pm$ 0.034 | 5.13 $\pm$ 0.54  |
|      | SPAD              | 0.210 $\pm$ 0.021 | 1.40 $\pm$ 0.74 | 0.166 $\pm$ 0.032 | 3.51 $\pm$ 1.01 | 0.255 $\pm$ 0.027 | 0.487 $\pm$ 0.991 | 0.294 $\pm$ 0.032 | 0.40 $\pm$ 1.25  | 0.266 $\pm$ 0.034 | 1.66 $\pm$ 1.19  |
|      | FLA $\times$ SPAD | .0065 $\pm$ .0006 | 5.92 $\pm$ 0.27 | .0063 $\pm$ .0006 | 6.17 $\pm$ 0.26 | .0065 $\pm$ .0005 | 6.35 $\pm$ 0.30   | .0063 $\pm$ .0005 | 7.13 $\pm$ 0.35  | .0075 $\pm$ .0007 | 6.41 $\pm$ 0.36  |
|      | TAB               | 1.390 $\pm$ 0.175 | 5.33 $\pm$ 0.44 | 0.971 $\pm$ 0.108 | 6.61 $\pm$ 0.27 | 1.147 $\pm$ 0.169 | 6.25 $\pm$ 0.42   | 1.749 $\pm$ 0.180 | 6.11 $\pm$ 0.54  | 1.685 $\pm$ 0.197 | 6.28 $\pm$ 0.48  |
|      | GM                | 2.923 $\pm$ 0.306 | 5.29 $\pm$ 0.37 | 2.140 $\pm$ 0.183 | 6.69 $\pm$ 0.20 | 3.076 $\pm$ 0.324 | 6.476 $\pm$ 0.366 | 3.532 $\pm$ 0.306 | 6.42 $\pm$ 0.43  | 3.908 $\pm$ 0.411 | 6.21 $\pm$ 0.44  |
|      | GN                | 0.124 $\pm$ 0.015 | 5.06 $\pm$ 0.44 | 0.101 $\pm$ 0.009 | 6.48 $\pm$ 0.22 | 0.140 $\pm$ 0.016 | 6.28 $\pm$ 0.41   | 0.165 $\pm$ 0.014 | 5.97 $\pm$ 0.47  | 0.181 $\pm$ 0.019 | 6.02 $\pm$ 0.47  |
